# Supplementary material for: S-nitrosylation of connexin43 hemichannels elicits cardiac stress–induced arrhythmias in Duchenne muscular dystrophy mice
Source: JCI journal article supplement (doi:10.1172/jci.insight.130091), 2019-11-21
Supplement: sd1 [file 1]

### **Fig S1. Injection of hyperpolarizing and depolarizing current are sufficient to regulated TA in isolated *Dmd<sup>mdx</sup>* cardiomyocytes.**

**A)** Representative action potentials traces of *Dmd<sup>mdx</sup>* isolated cardiomyocytes in the absence or presence of 1 $\mu$ M isoproterenol (Iso). Hyperpolarizing (20-12 pA) or depolarizing currents (12-8 pA) were injected to maintain the resting membrane potential close to -70 mV (value observed in WT cardiomyocytes) or near -60 mV (value observed in *Dmd<sup>mdx</sup>* cardiomyocytes treated with Iso), respectively. Arrow indicates electrical stimulation pulse. **B)** Quantification of TA observed in conditions shown in **(A)**. The number in parentheses indicates the *n* value. Comparisons between groups were made using two-way ANOVA plus Tukey post-hoc test, \*P<0.05.

### **Fig S2. Na<sup>+</sup>/Ca<sup>2+</sup> exchanger (NCX) inhibition does not prevent Iso-induced triggered activity in *Dmd<sup>mdx</sup>* cardiomyocytes.**

**(A)** Representative action potential traces of *Dmd<sup>mdx</sup>* isolated cardiomyocytes. Cells were stimulated with 1 $\mu$ M isoproterenol (Iso) in the presence of 10  $\mu$ M SEA0400 a selective inhibitor of NCX. Arrow indicates electrical stimulation pulse. **B)** Quantification of TA observed in conditions shown in **(A)**. The number in parentheses indicates the *n* value. Comparisons between

groups were made using Student's t-test, \* $P < 0.05$  vs Vehicle. C) Resting membrane potential of *Dmd<sup>mdx</sup>* cardiomyocytes. The number in parentheses indicates the  $n$  value. Comparisons between groups were made using Student's t-test, \* $P < 0.05$  vs vehicle.

**Fig S3. WT and in *Dmd<sup>mdx</sup>* hearts do not show PI uptake after mice were treated with Iso.**

Representative images of isolated hearts perfused with Tyrode buffer containing 50  $\mu$ M PI after treatment with Iso (5mg/kg, IP). Cryosections were stained with wheat germ agglutinin (WGA, green) and nuclei were stained blue with DAPI mounting reagent. Representative images of  $n = 3$  per group.

**Fig S4. *Dmd<sup>mdx</sup>* Cx43<sup>+/-</sup> cardiomyocytes display a lower level of laterally localized Cx43 than *Dmd<sup>mdx</sup>*.**

A) Western blot analysis (top) and quantification (graph) of Cx43 from biotin perfused hearts (biotinylation). Bottom row represents Cx43-immunoblotted samples from heart lysates prior to pulldown (total Cx43). Biotinylated Cx43 levels were expressed as fold change relative to total Cx43 protein levels per sample. The number in parentheses indicates the  $n$  value. Comparisons between groups were made using two-way ANOVA plus Tukey post-hoc test. \* $P < 0.05$  vs Control *Dmd<sup>mdx</sup>*; Cx43<sup>(+/-)</sup>, † $< 0.05$  vs *Dmd<sup>mdx</sup>*.

**Fig S5. Dystrophic hearts with lower levels of Cx43 prevent the Iso-induced S-nitrosylated levels of Cx43.**

A) Top: Western blot detection of Cx43 and Middle: Ponceau staining of samples subjected to the biotin switch assay. Lower: Western blot detection of Cx43 in total cardiac protein lysates. Graph: quantification of 6 independent blots using the ratio of SNO-Cx43/Total. Comparisons between groups were made using two-way ANOVA plus Tukey post-hoc test. \* $P < 0.05$  vs WT control, † $< 0.05$  vs WT Iso, \*\* $< 0.05$  vs *Dmd<sup>mdx</sup>*. B) Proximity Ligation assay (PLA) of Cx43 and S-nitrosylation in heart sections of WT, *Dmd<sup>mdx</sup>* and *Dmd<sup>mdx</sup>*; Cx43<sup>(+/-)</sup> mutants. Detection of Wheat germ agglutinin (WGA) (green) and S-nitrosylated Cx43 (Cx43-SNO) (red), respectively. Representative images of  $n = 4$  per group.

**Fig S6. Cx43 variants carrying a carboxyterminal truncation or a C271S mutation do not affect gating when co-expressed as heteromeric channel with Cx26S17F.**

(A) Representative current traces elicited by a voltage pulse from -80 to 0 mV from oocytes expressing heteromeric channels formed by full length, CT truncated Cx43 or Cx43C271S with Cx26S17F. Black and red traces correspond to voltage activated hemichannel currents in the absence or presence of 10  $\mu$ M DEENO, respectively. Representative traces of  $n = 9$  per group. (B) Nitric oxide did not activate homomeric Cx26 and Cx26S17F hemichannels. Representative current traces elicited by a voltage pulse from -80 to 0 mV for an oocyte expressing Cx26 and Cx26S17F. Black and red traces correspond to voltage activated hemichannel currents in the absence or presence of 10  $\mu$ M DEENO, respectively. Representative traces of  $n = 6$  per group.

**Fig. S7. WT, *Dmd<sup>mdx</sup>* cardiomyocytes display similar K<sup>+</sup> currents.**

A) Representative current traces before and after application of 100  $\mu$ M Gap19 and/or 1  $\mu$ M Iso in WT and *Dmd<sup>mdx</sup>* isolated cardiac cells. K<sup>+</sup> currents were measured using the orange section detected during a ramp protocol.

A negative ramp (from +40 to -120 mV) was used to prevent activating the voltage-gated sodium channel. **B)** Quantification of reversal membrane potential detected in conditions shown in (A). The number in parentheses indicates the *n* value.

**Fig S8. Cx43 hemichannels are involved in the prolongation of APD in WT**

**and dystrophic cardiomyocytes upon isoproterenol treatment.** **A)** Representative action potential traces of WT, *Dmd<sup>mdx</sup>* and *Dmd<sup>mdx</sup>Cx43<sup>+/-</sup>* isolated cardiomyocytes. Cells were stimulated with 1μM isoproterenol (Iso) in the absence or presence of Cx43 blockers contained inside the pipette: Gap19 (232ng/μL) and Cx43 CT antibody (abCx43; 2.5ng/μL). Arrows represent electrical stimulation. Note that *Dmd<sup>mdx</sup>* isolated cardiomyocytes have extended APD compared to WT and *Dmd<sup>mdx</sup>Cx43<sup>+/-</sup>* isolated cardiac cells. **B)** Quantification of APD observed in (A). The number in parentheses indicates the *n* value. Comparisons between groups were made using two-way ANOVA test plus Tukey post-hoc test. \*P<0.05, † <0.05 vs WT isoproterenol.

**Fig S9. Nitric oxide canonical pathway (cGMP-PKG) does not mediate TA in isolated cardiomyocytes and Cx43 hemichannels activation.**

**A)** Representative action potentials traces from *Dmd<sup>mdx</sup>* isolated cardiomyocytes. Cells were stimulated with 1μM Iso in the absence or presence of ODQ (a highly selective, irreversible, inhibitor of soluble guanylyl cyclase) or KT 5823 (selective protein kinase G inhibitor) contained inside the pipette: ODQ (3 μM) and KT 5823 (1 μM). Arrow indicates electrical stimulation pulse. Note that both inhibitors ODQ and KT 5823 did not affect the TA and the *V<sub>m</sub>* induced by Iso stimulation. The number in parentheses indicates the *n* value. Comparisons between groups were made using two-way ANOVA plus Tukey post-hoc test \*P<0.05 vs WT. **B)** Representative current traces after application of 10 μM DEENO in an oocyte expressing Cx43 in the absence or presence of intracellular injections of ODQ (3 μM final intracellular concentration) and KT 5823 (1 μM final intracellular concentration). Oocytes were clamped to -80 mV, and square pulses from -80 mV to +90 mV (in 10 mV steps) were then applied for 2s. Normalized currents were obtained from the ratio between recorded current after and before DEENO treatment. Note that soluble guanylyl cyclase and protein kinase G inhibition did not significantly affect NO-induced hemichannel currents in oocytes expressing Cx43.

**Fig S10. Full length western blots.** (A), (B), (C) and (D) biotin Cx43 pull down, biotin N-Cadherin pull down, biotin eNOS pull down and total Cx43 displayed in Fig. 2. (E) S-nitrosylated levels of Cx43 and total Cx43 presented (F) Fig. 3A. (G) and (H) S-nitrosylated levels of Cx43 and total Cx43 in human samples showed in Fig. 3D. (I) S-nitrosylated levels of Cx43 in oocytes expressing Cx43 upon NO stimulation and (J) respectively total Cx43 presented in Fig. 7C. (K) S-nitrosylated levels of Cx4, (L) total Cx43 showed in Fig. S4 and (M) total Cx43 displayed in Fig. S5. Red lines indicated the western blot cropped showed in each figure previous indicated.

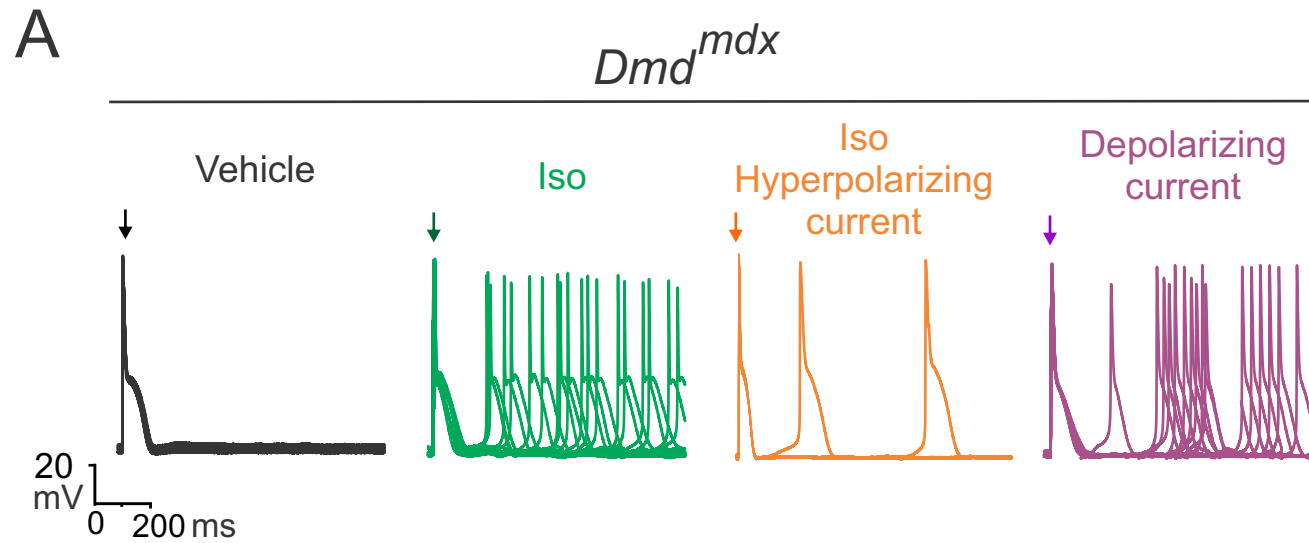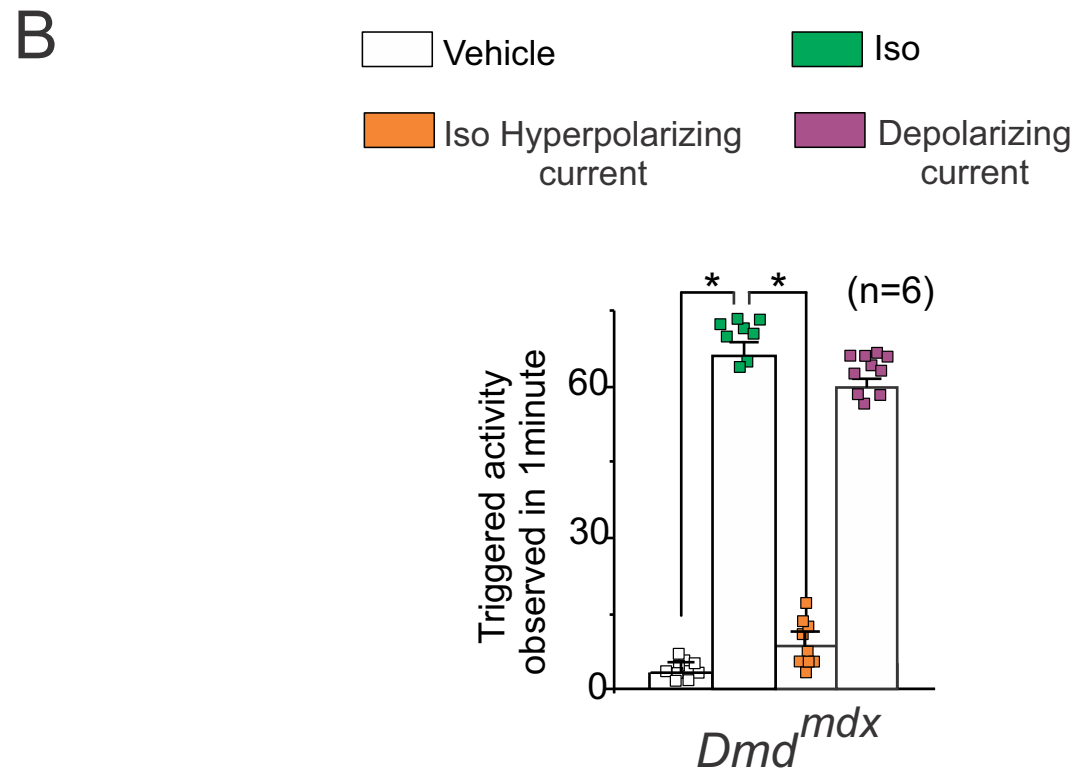

Figure S1



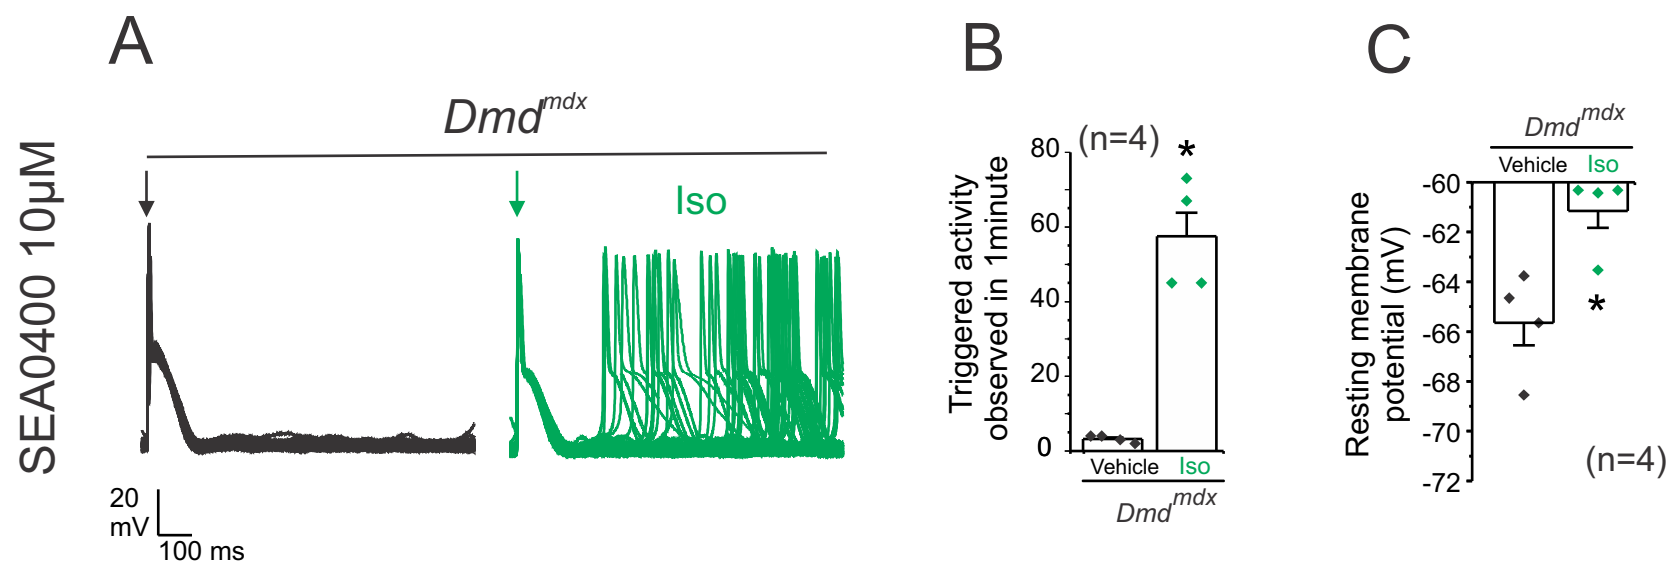

Figure S2

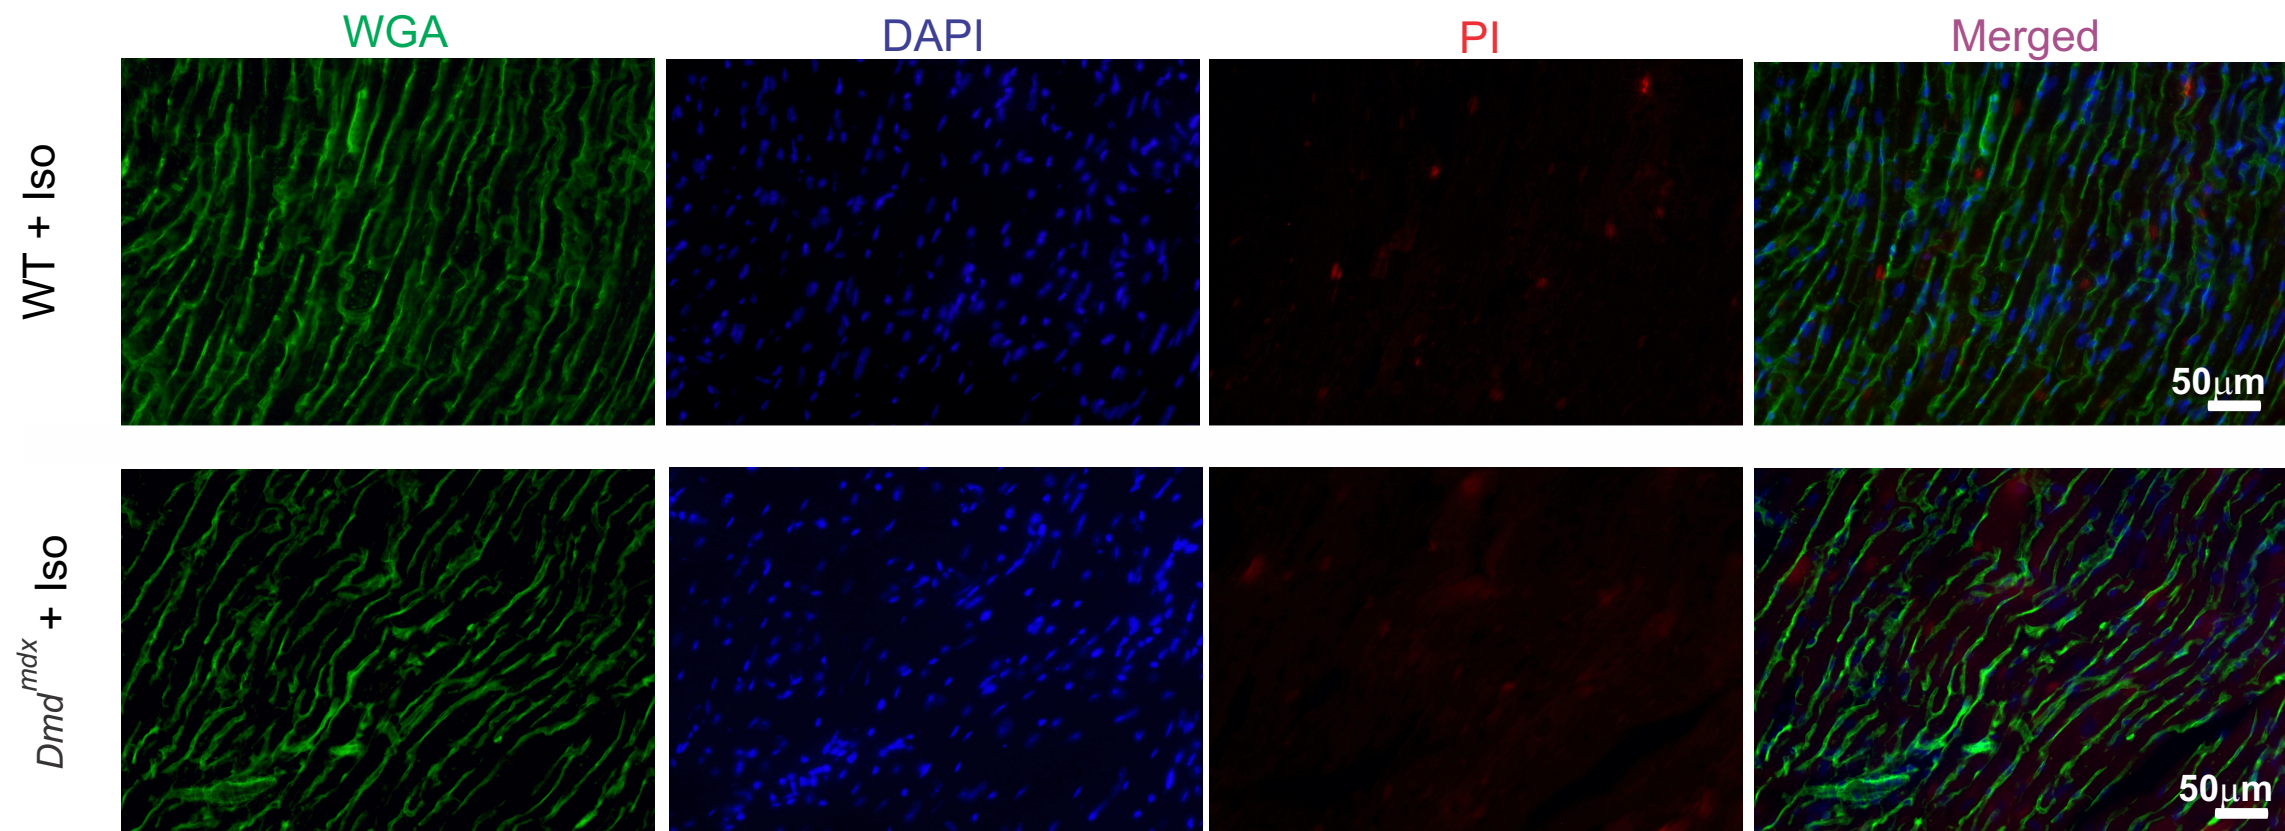

Figure S3

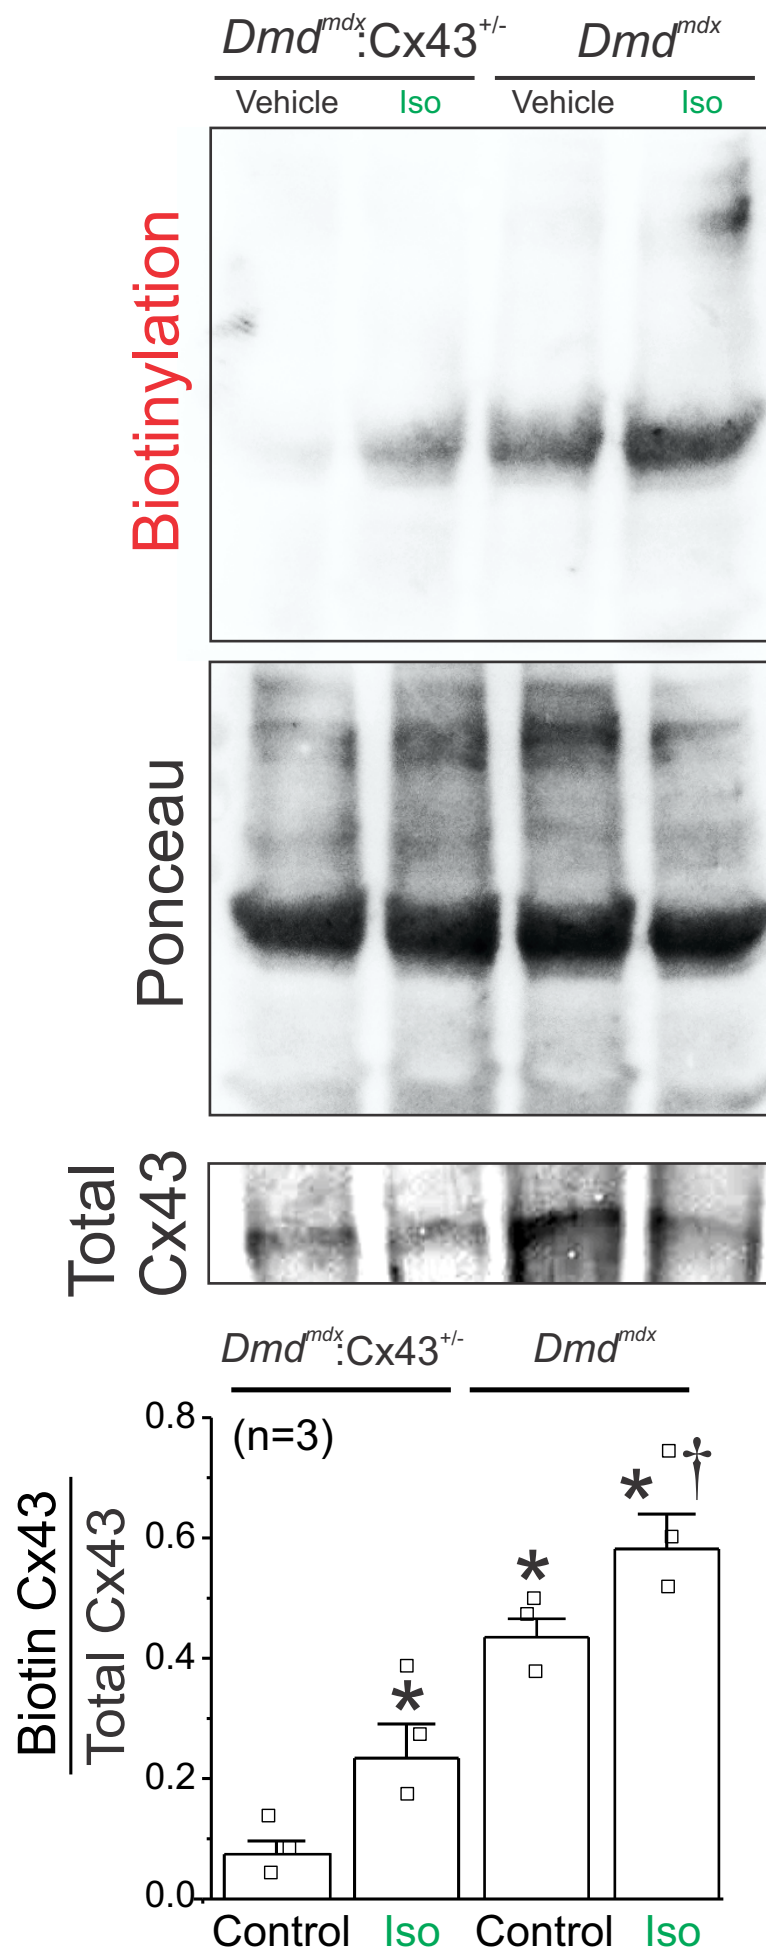

Figure S4

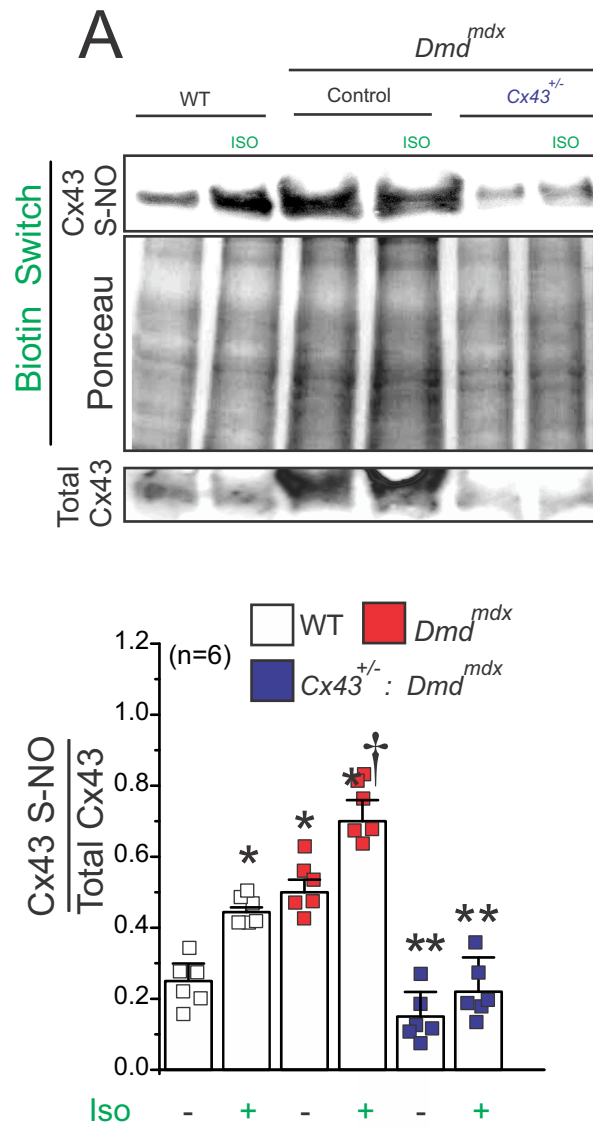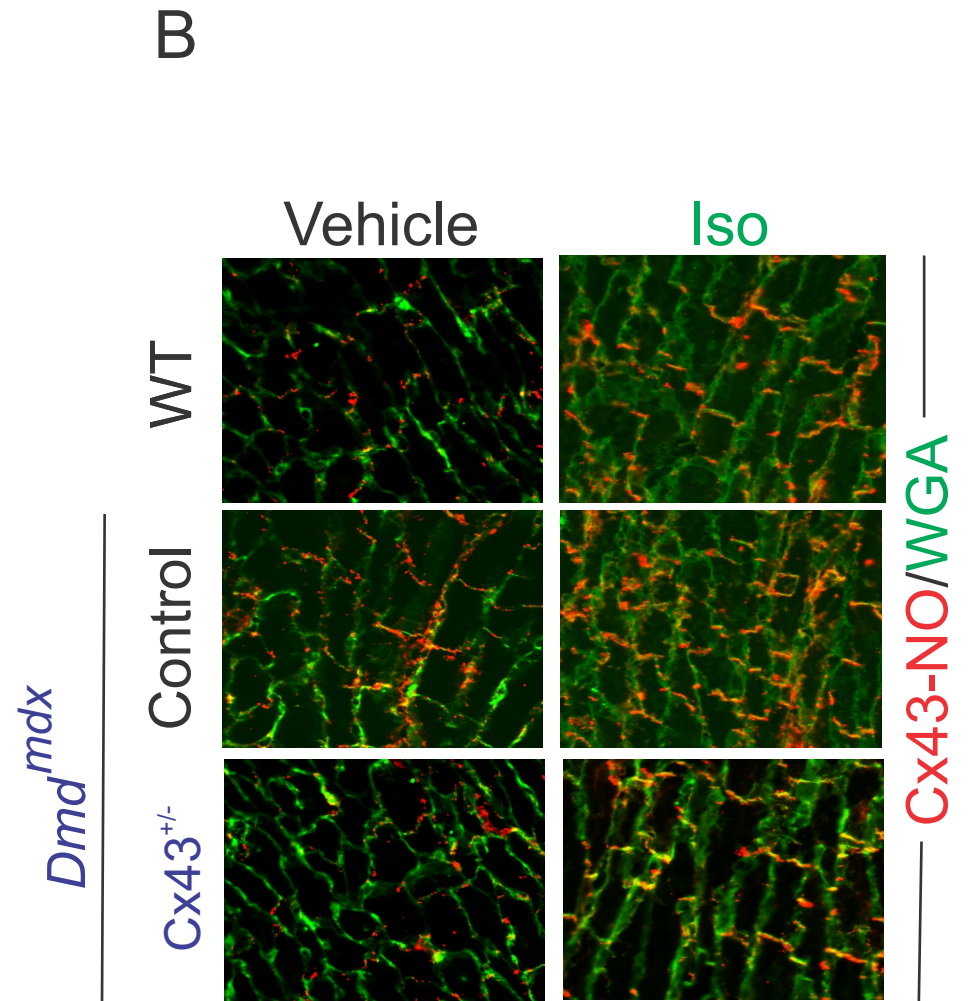

Figure S5

A

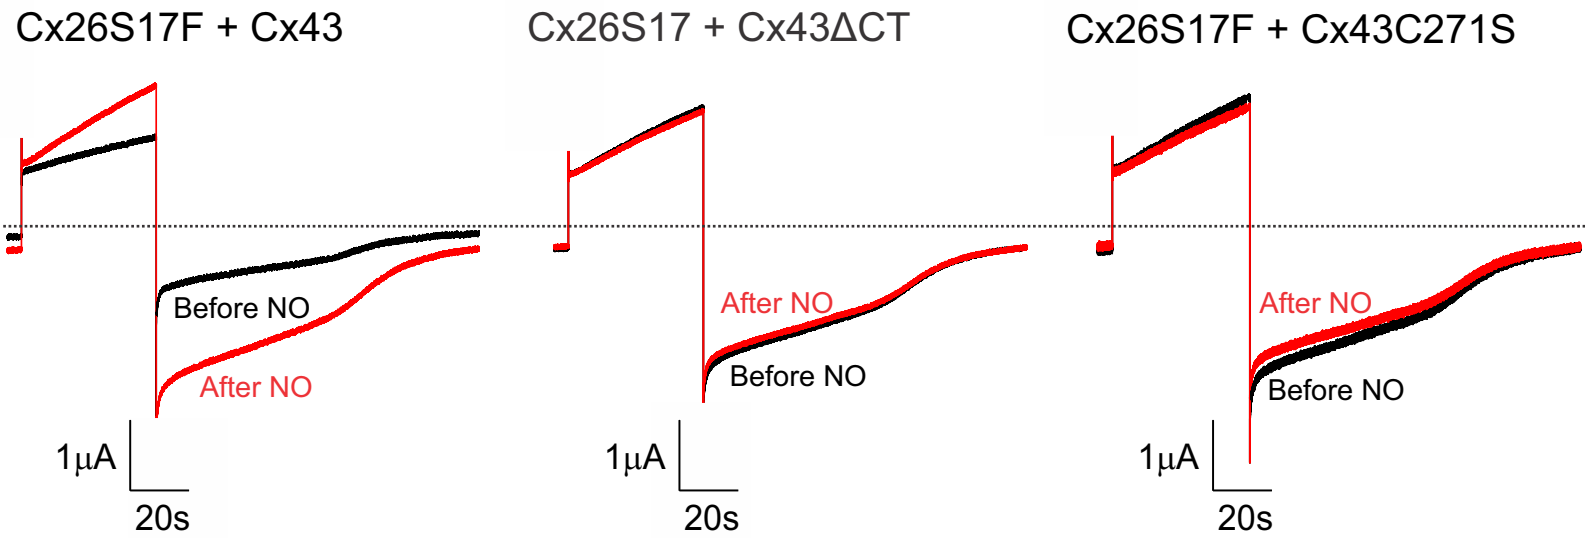

B

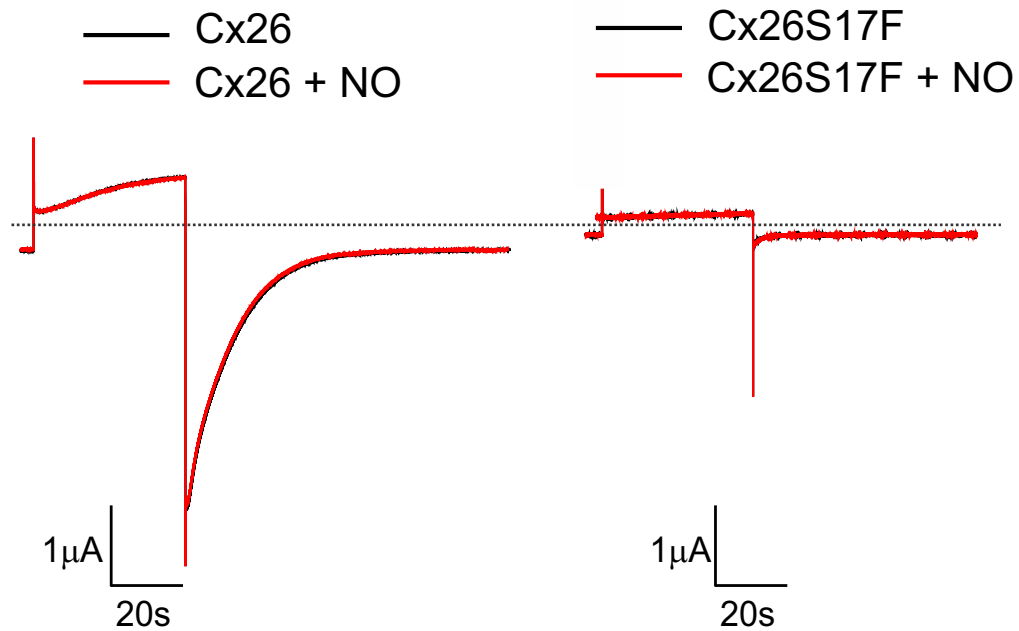

Figure S6

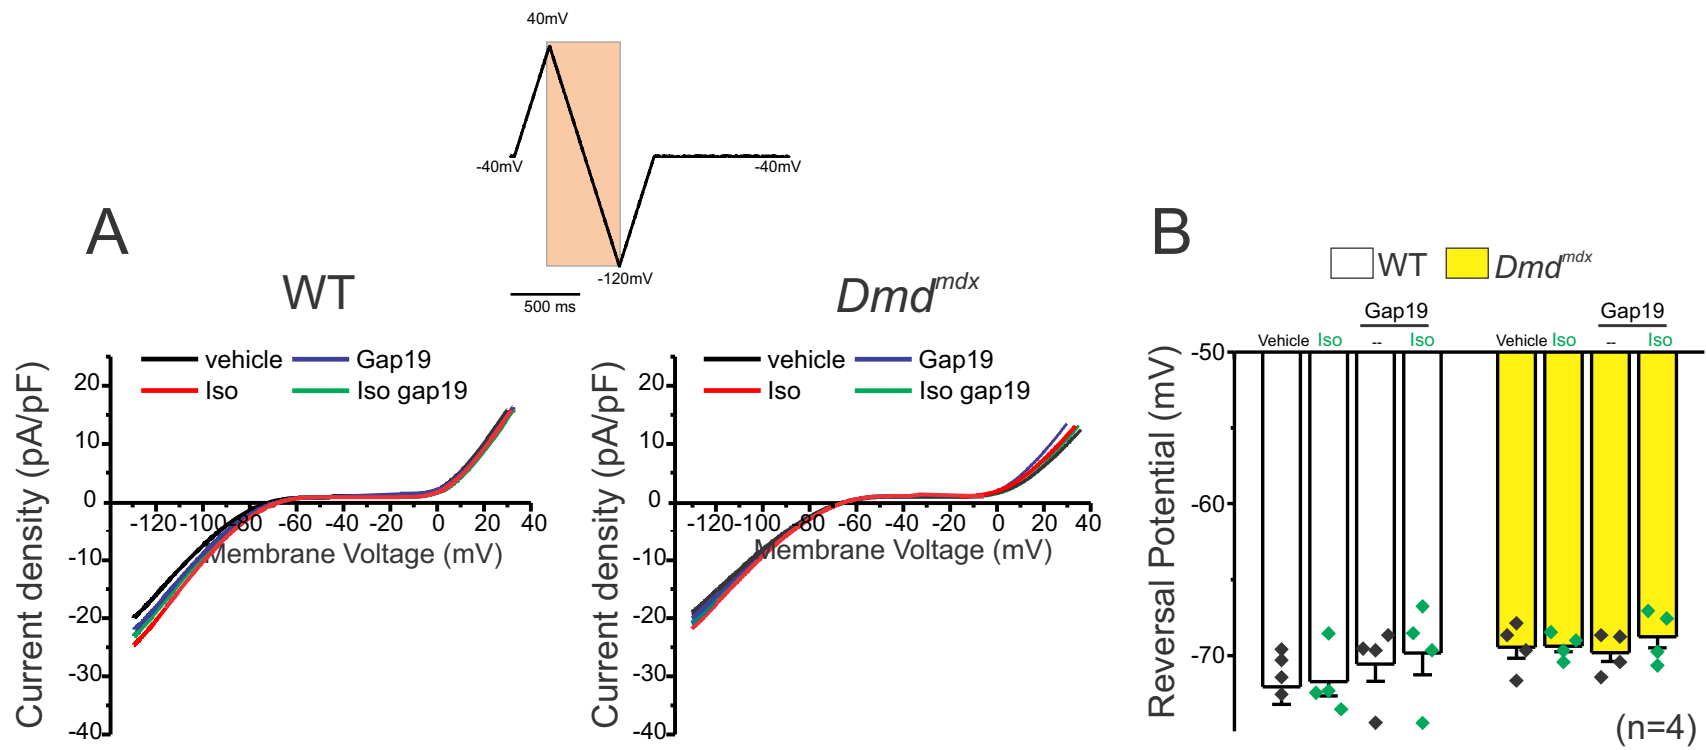

Figure S7



A

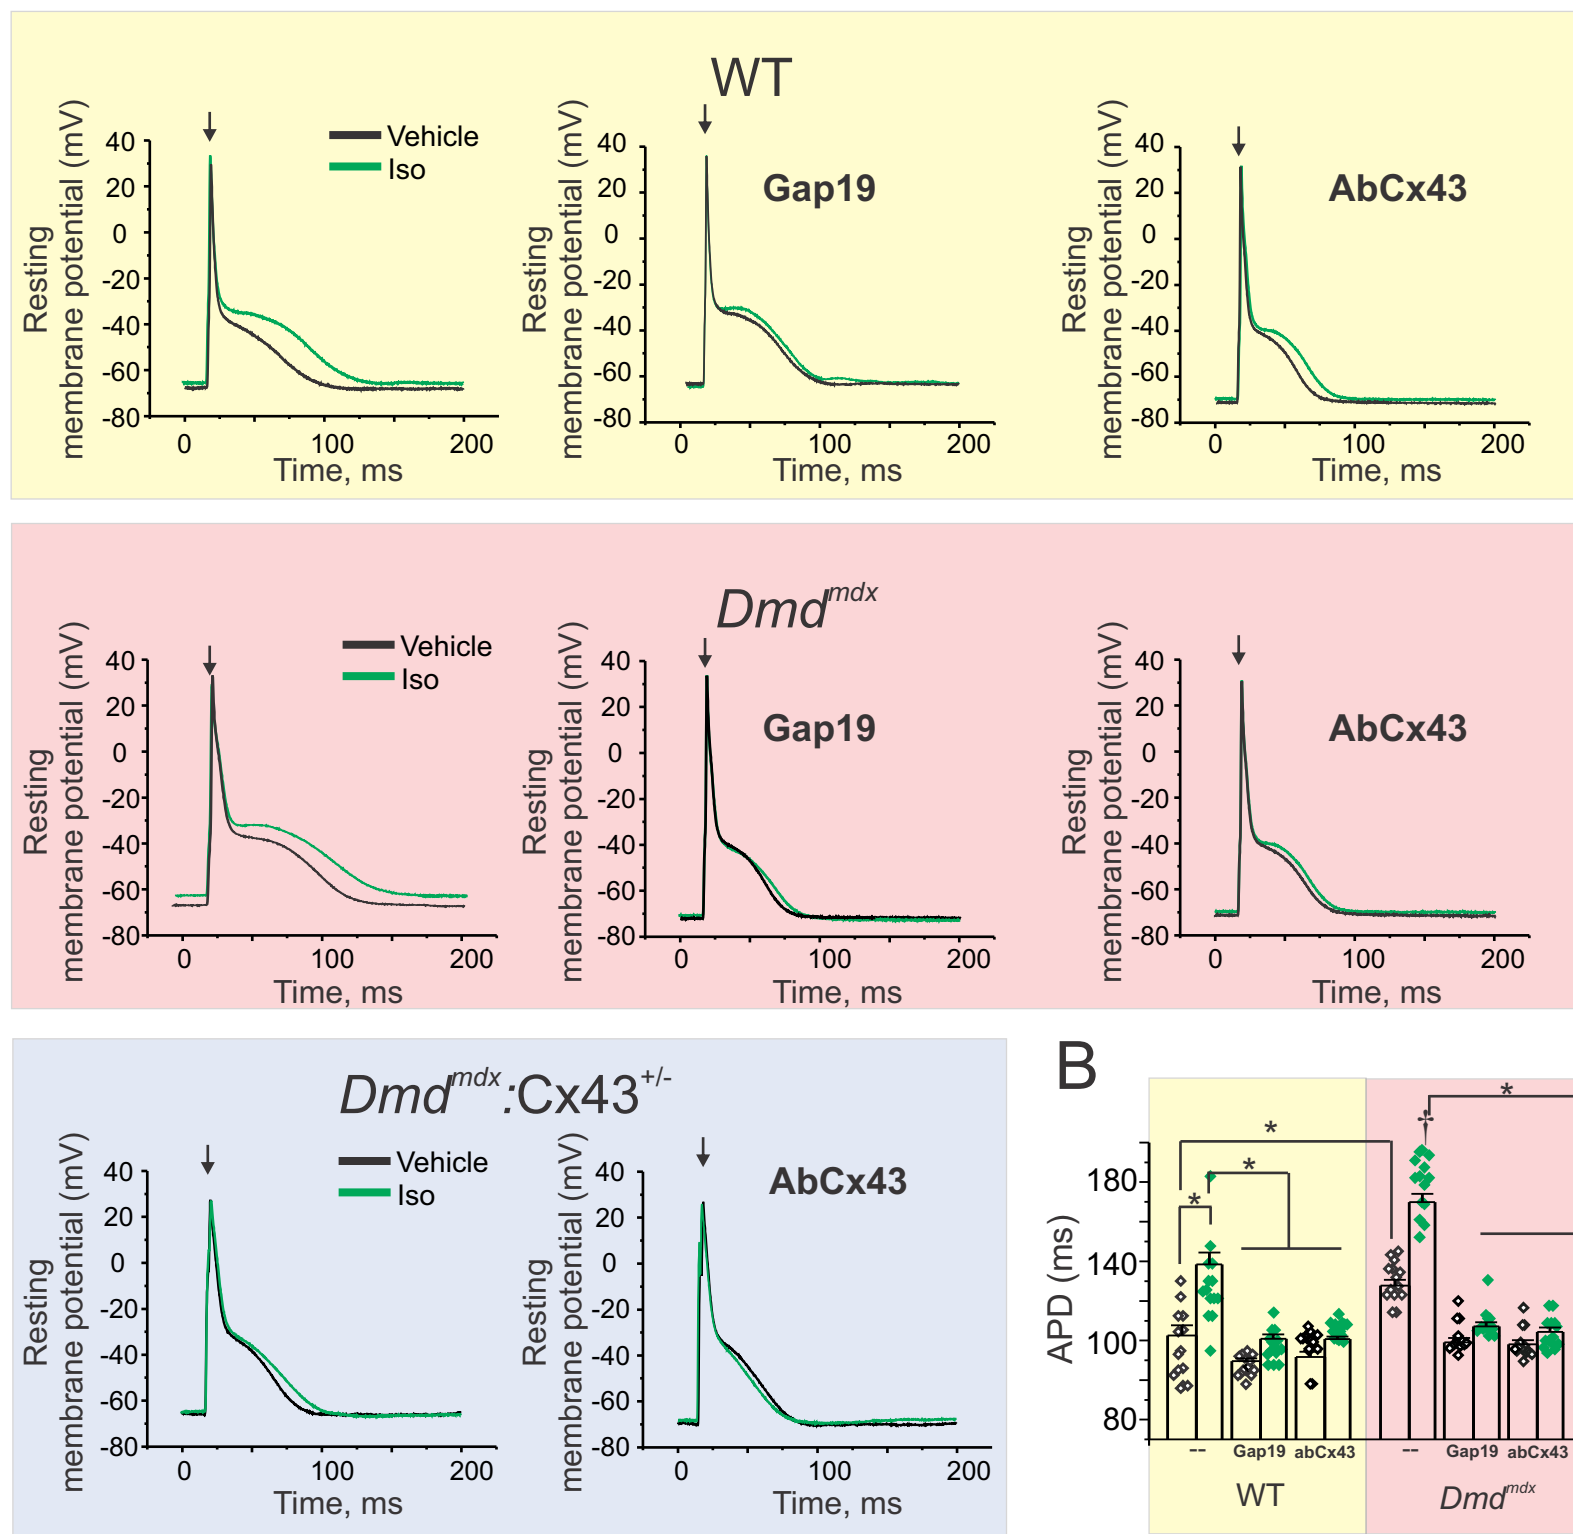

B

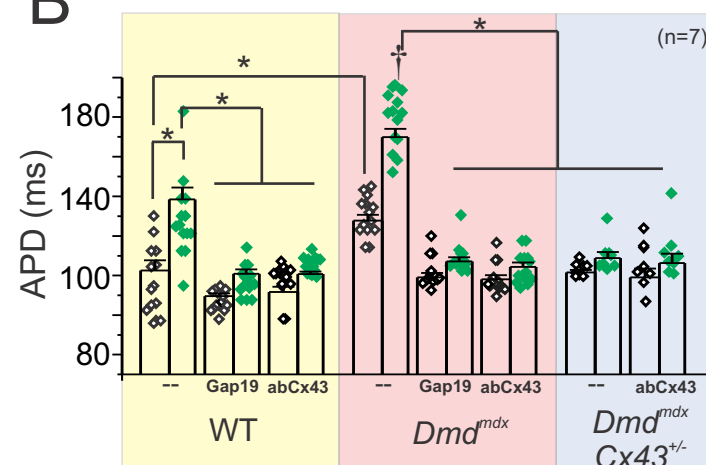

Figure S8

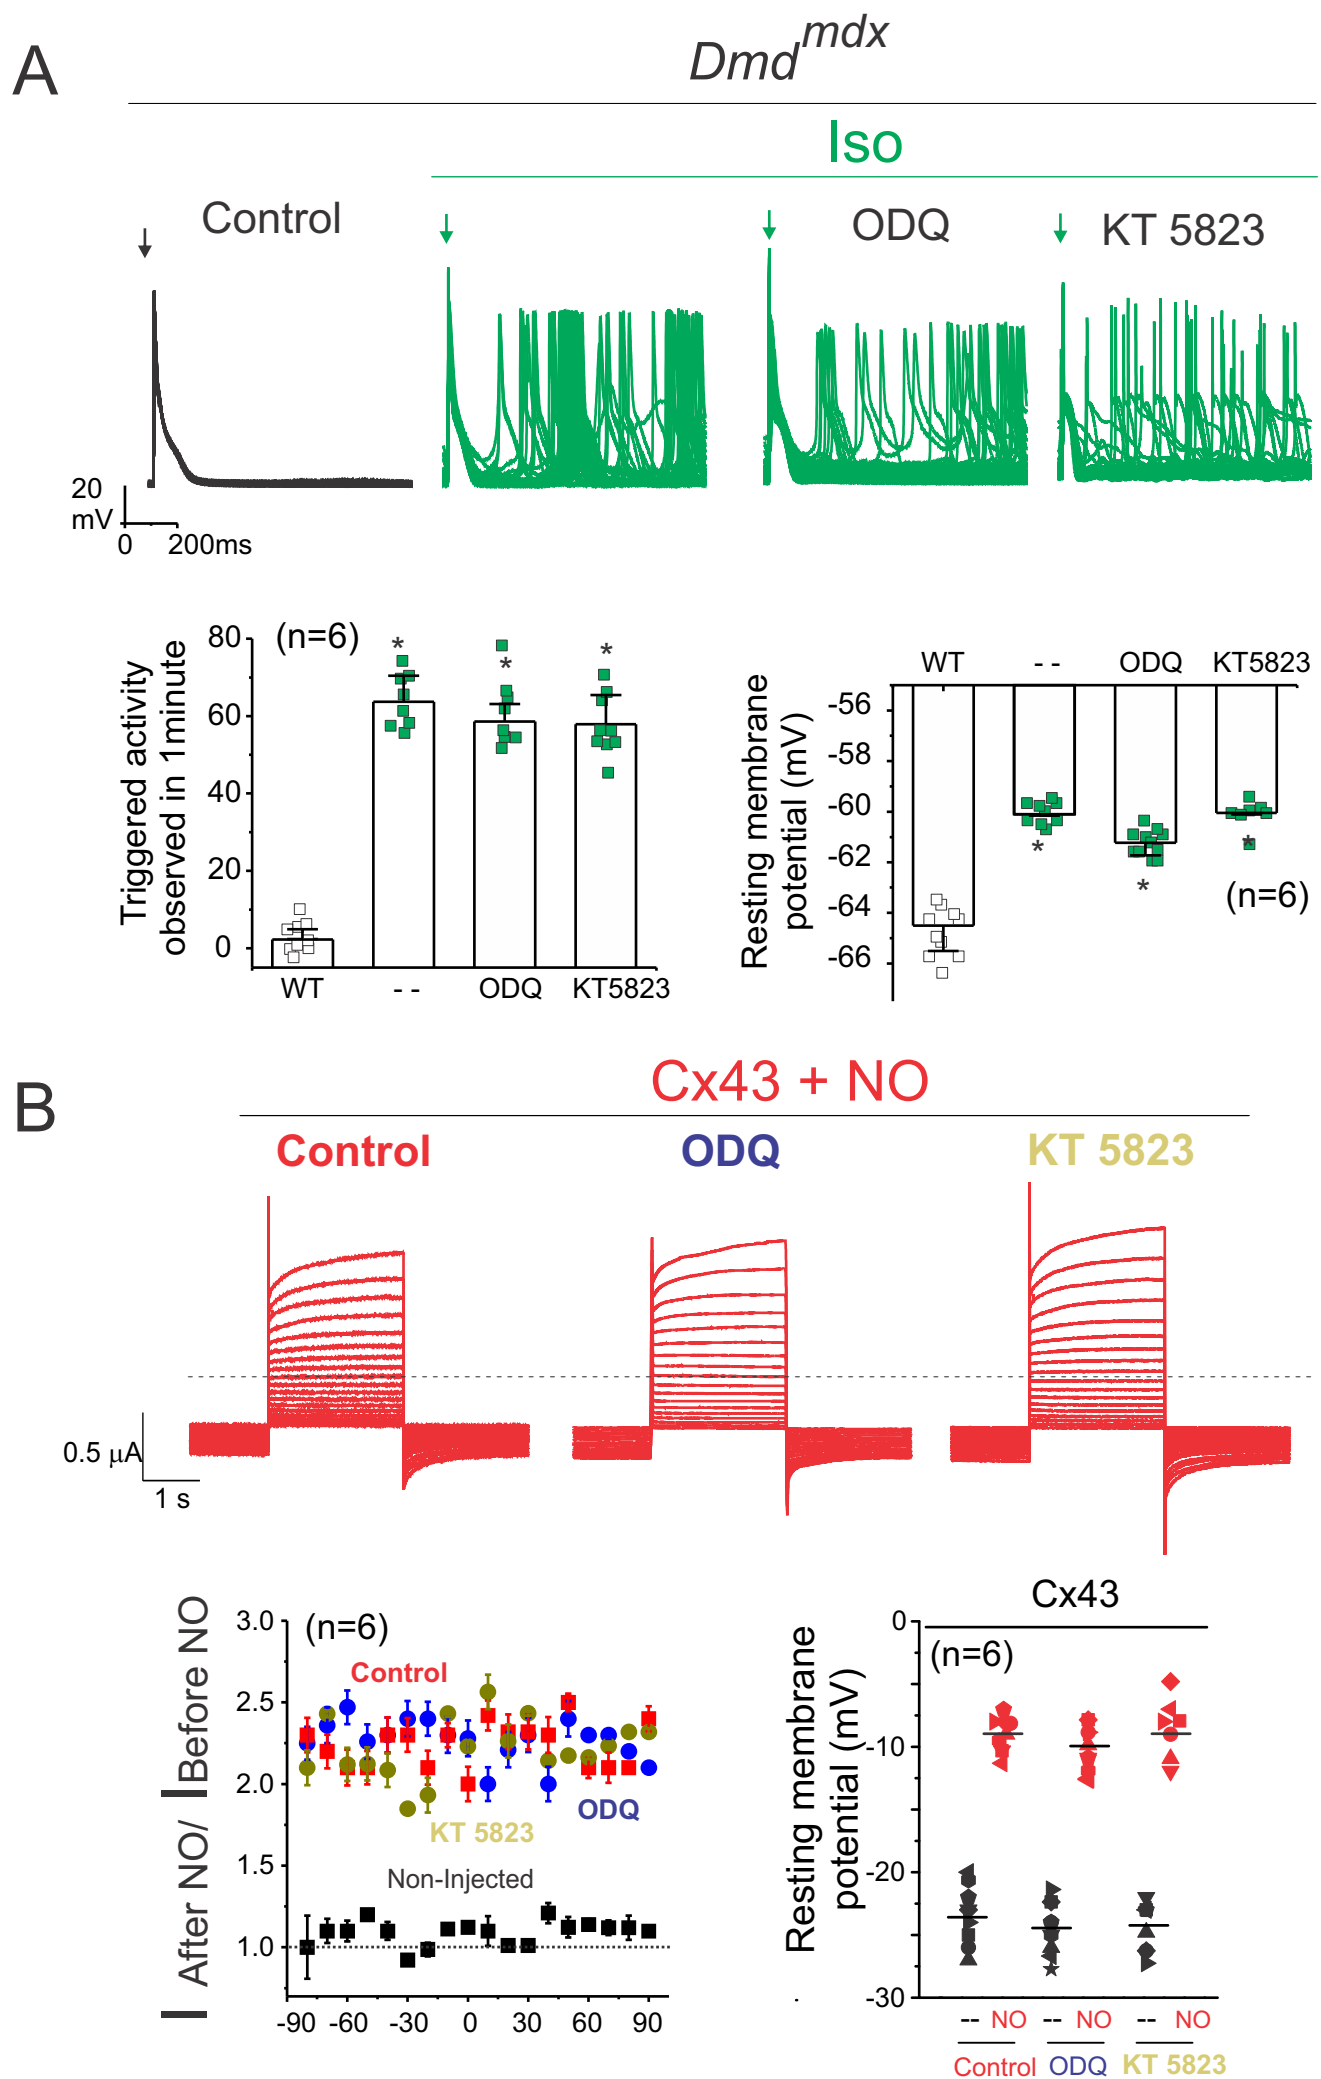

Figure S9
